# Supplementary material for: Measuring the primary cilium length: improved method for unbiased high-throughput analysis
Source: PubMed Central journal article supplement (PMC4750300; doi:10.1186/s13630-016-0028-2), 2016-02-11

Additional Figure 1

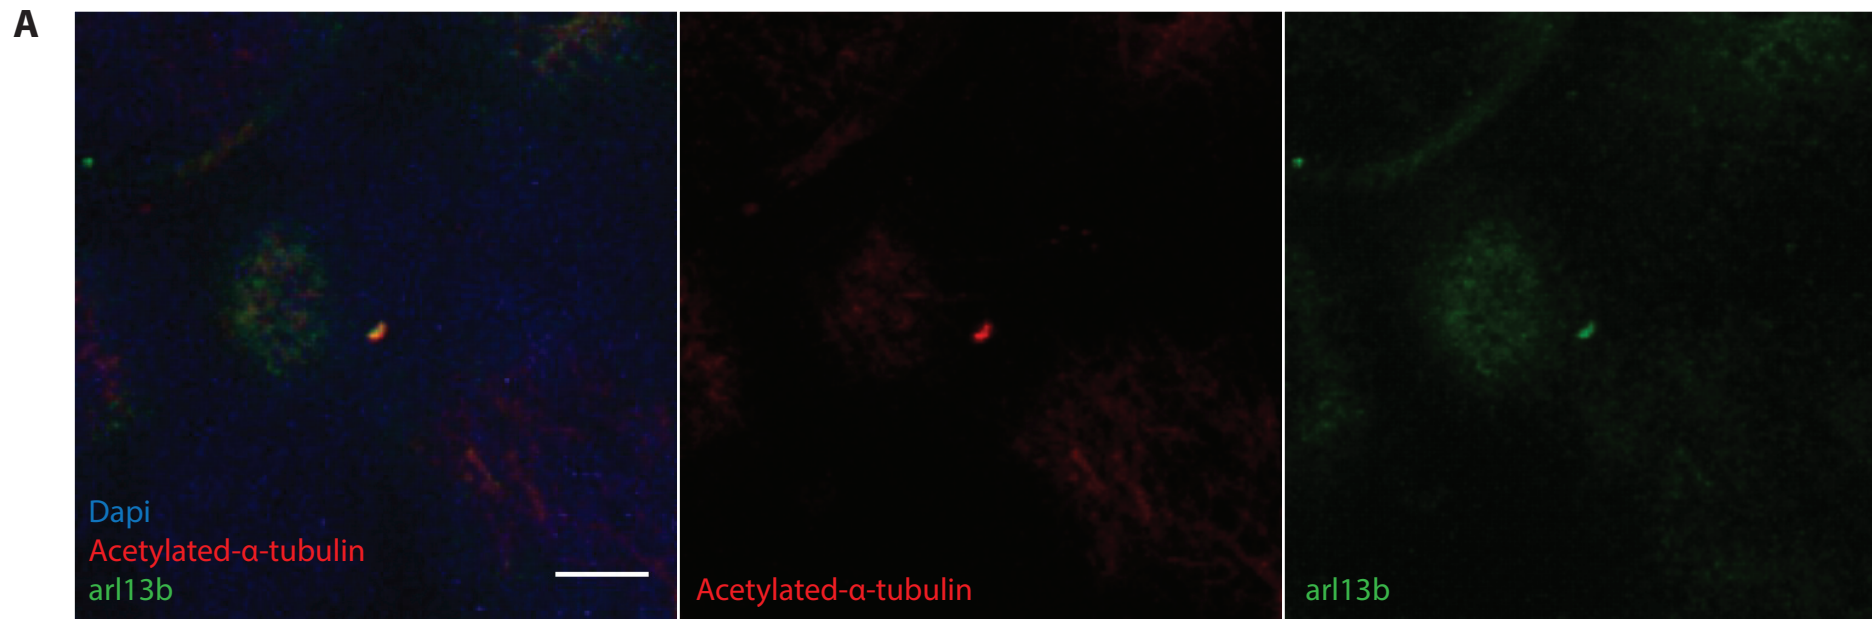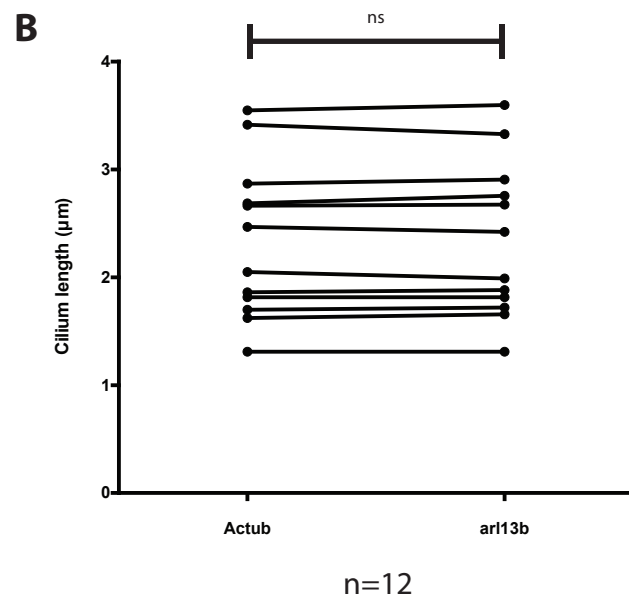

Supplement: 13630_2016_28_MOESM1_ESM.pdf [file 13630_2016_28_MOESM1_ESM.pdf]
